# Supplementary material
Source: PubMed Central journal article supplement (PMC6694401)
Supplement: jamacardiol-4-918-s001.pdf [file jamacardiol-4-918-s001.pdf]

## Supplementary Online Content

Norrish G, Ding T, Field E, et al. Development of a novel risk prediction model for sudden cardiac death in childhood hypertrophic cardiomyopathy (HCM Risk-Kids). *JAMA Cardiol*. Published online August 14, 2019. doi:10.1001/jamacardio.2019.2861

**eFigure 1.** Pediatric Risk Model for (SCD) in (HCM Risk-Kids)

**eFigure 2.** Bar Chart Showing Age Distribution of Cohort

**eFigure 3.** Comparison of Observed and Predicted Risk by Clinical Risk Group for External Validation of Adult HCM-Risk SCD Model

**eTable 1.** Number of Patients Enrolled by Participating Center

**eTable 2.** Summary of Candidate Predictors Following Systematic Review of Literature

**eTable 3.** Baseline Clinical Characteristics by Era

**eTable 4.** Summary of Missing Data

**eTable 5.** Sensitivity Analysis: Model Including Age and Family History of SCD

**eAppendix.** HCM Risk-Kids Calculator

**eReferences.**

This supplementary material has been provided by the authors to give readers additional information about their work.

eFigure 1. Pediatric Risk Model for (SCD) in (HCM Risk-Kids)

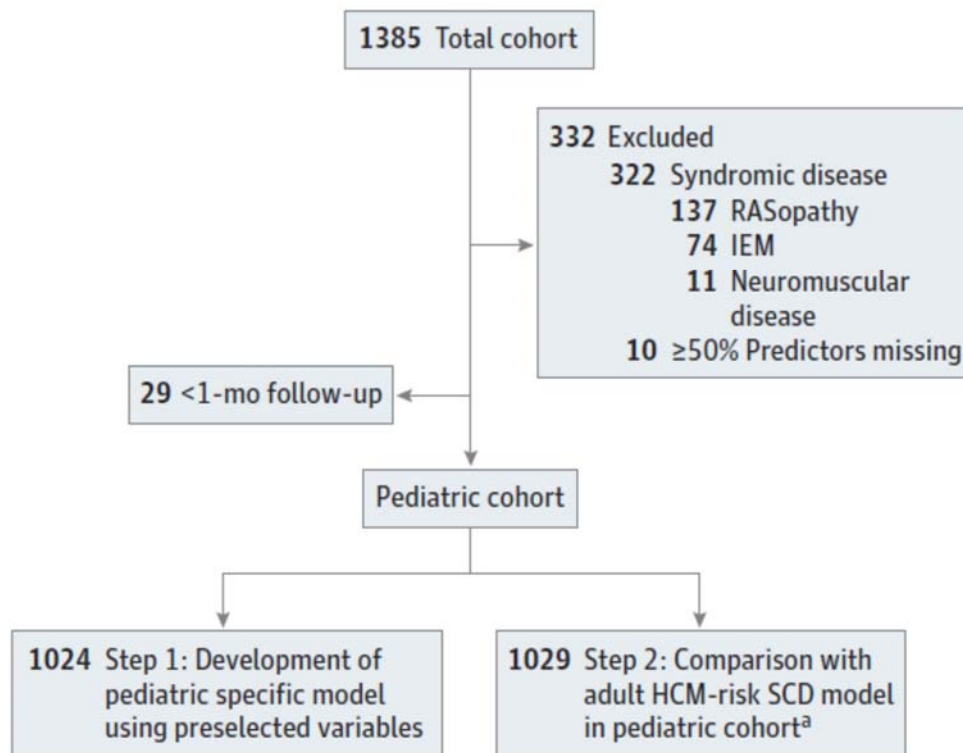

<sup>a</sup>Five additional patients were included in the comparison with adult model excluded from the pediatric development owing to more than 50% missing data for pediatric variables.

eFigure 2. Bar Chart Showing Age Distribution of Cohort

A age at baseline

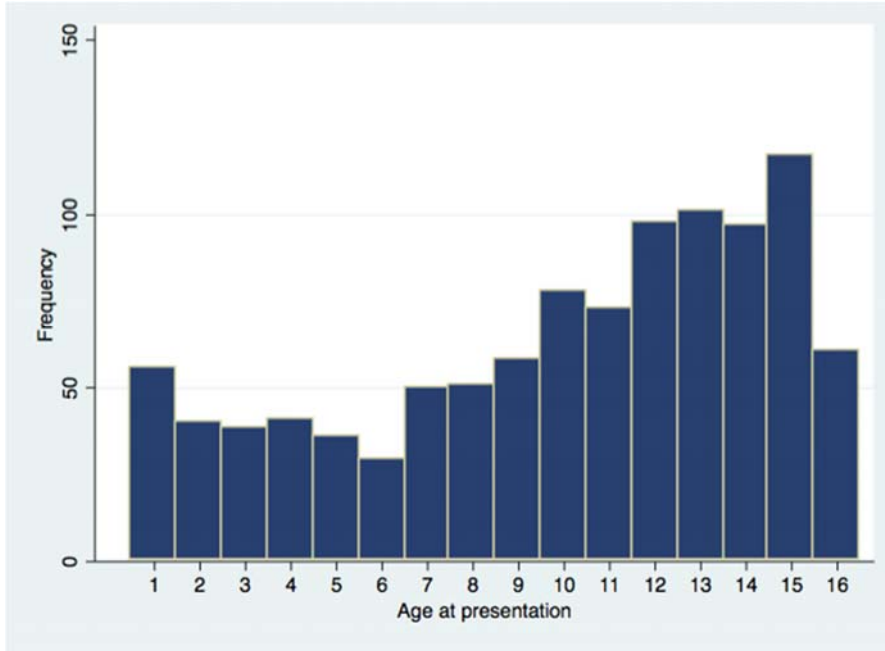

B age at time of SCD-end point

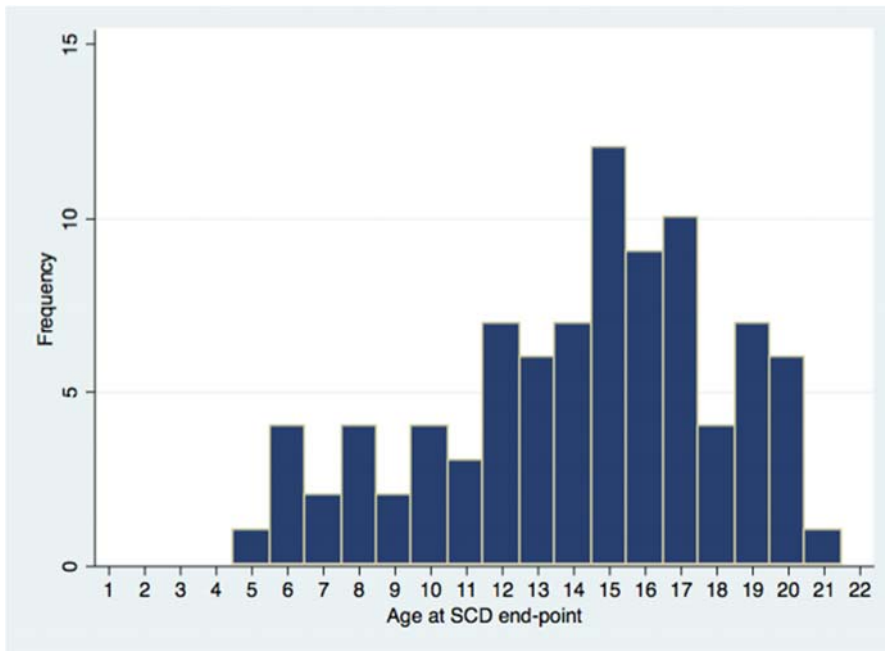

eFigure 3. Comparison of Observed and Predicted Risk by Clinical Risk Group for External Validation of Adult HCM-Risk SCD Model.

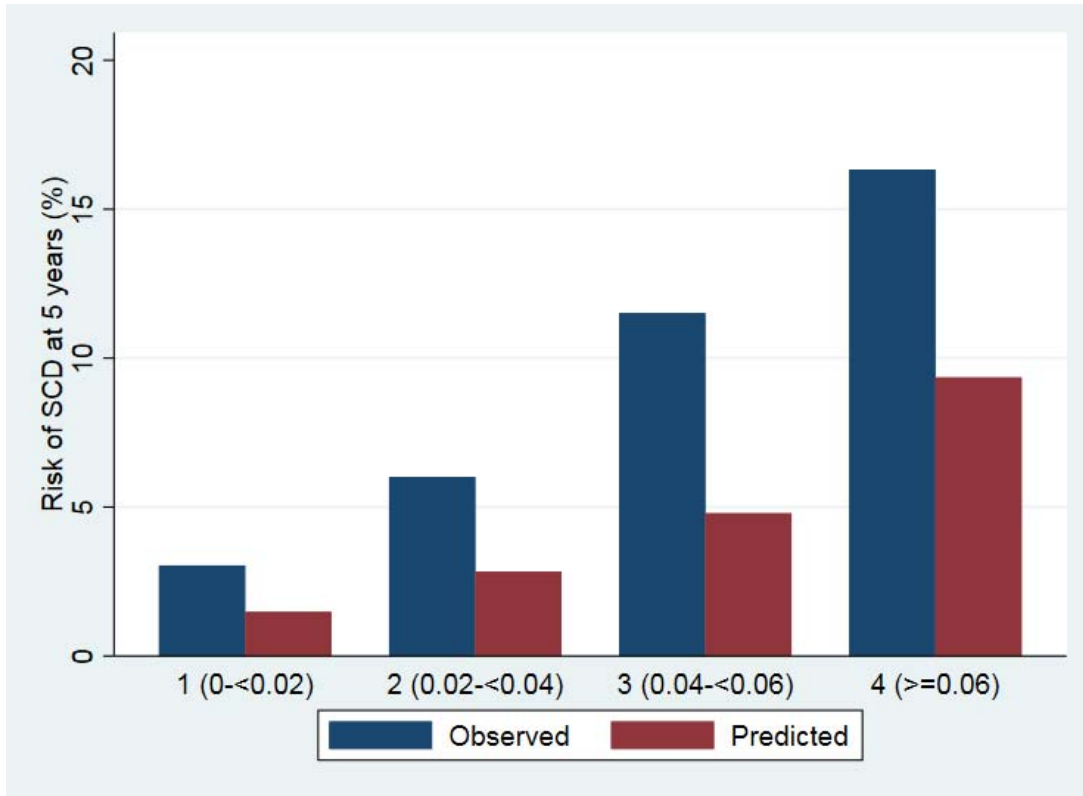

*Vertical bars represent observed (blue) and model-based predicted (red) probability of SCD by 5 years using one imputed data set.*

eTable 1. Number of Patients Enrolled by Participating Center

|    | <b>Centre</b>                                                    | <b>Number of patients enrolled</b> | <b>% of cohort</b> |
|----|------------------------------------------------------------------|------------------------------------|--------------------|
| 1  | Great Ormond Street Hospital, London, UK                         | 210                                | 20.5               |
| 2  | Children's Memorial Health Institute, Warsaw, Poland             | 101                                | 9.9                |
| 3  | Careggi University Hospital, Florence, Italy                     | 79                                 | 7.7                |
| 4  | Monaldi Hospital, Naples, Italy                                  | 52                                 | 5.1                |
| 5  | Onassis Cardiac Surgery Centre, Athens, Greece                   | 45                                 | 4.4                |
| 6  | The Royal Children's Hospital, Melbourne, Australia              | 44                                 | 4.3                |
| 7  | S. Orsola-Malpighi Hospital, Bologna, Italy                      | 41                                 | 4                  |
| 8  | Our Lady's Children's Hospital, Dublin, Ireland                  | 36                                 | 3.5                |
| 9  | Royal Hospital for Children, Glasgow, UK                         | 34                                 | 3.3                |
| 10 | Favaloro Foundation University Hospital, Buenos Aires, Argentina | 32                                 | 3.1                |
| 11 | Leiden University Medical Center, Leiden, Netherlands            | 30                                 | 2.9                |
| 12 | Bambino Gesù Hospital, Rome, Italy                               | 27                                 | 2.6                |
| 13 | University Hospital Motol, Prague, Czech Republic                | 23                                 | 2.3                |
| 14 | Royal Brompton and Harefield NHS Trust, London, UK               | 22                                 | 2.2                |
| 15 | Hospital Sant Joan de Deu, Barcelona, Spain                      | 20                                 | 2                  |
| 16 | Papa Giovanni XXIII hospital, Bergamo, Italy                     | 19                                 | 1.9                |
| 17 | Birmingham Children's Hospital, Birmingham, UK                   | 15                                 | 1.5                |
| 18 | Hospital General Universitario Gregorio Marañon, Madrid, Spain   | 15                                 | 1.5                |
| 19 | University Hospital of Wales, Cardiff, UK                        | 14                                 | 1.4                |
| 20 | Leeds General Infirmary, Leeds, UK                               | 14                                 | 1.4                |
| 21 | Val d'Hebron University Hospital, Barcelona, Spain               | 14                                 | 1.4                |
| 22 | University Hospital Virgen de la Arrixaca, Murcia, Spain         | 12                                 | 1.2                |
| 23 | Bristol Royal hospital for Children, Bristol, UK                 | 12                                 | 1.8                |
| 24 | Niguarda Hospital, Milan, Italy                                  | 12                                 | 1.2                |

|           |                                                                   |    |     |
|-----------|-------------------------------------------------------------------|----|-----|
| <b>25</b> | Complejo Hospitalario Universitario A Coruña, Spain               | 11 | 1.1 |
| <b>26</b> | University Hospital La Paz, Madrid, Spain                         | 10 | 1   |
| <b>27</b> | John Radcliffe Hospital, Oxford, UK                               | 10 | 1   |
| <b>28</b> | Glenfield Hospital, Leicester, UK                                 | 9  | 0.9 |
| <b>29</b> | Southampton General Hospital, Southampton, UK                     | 9  | 0.9 |
| <b>30</b> | Hospital Universitario Puerta de Hierro Majadahonda Madrid, Spain | 7  | 0.7 |
| <b>31</b> | Aarhus University Hospital, Aarhus, Denmark                       | 7  | 0.7 |
| <b>32</b> | University Hospitals Parma, Italy                                 | 7  | 0.7 |
| <b>33</b> | Alder Hey Children's hospital, Liverpool, UK                      | 6  | 0.6 |
| <b>34</b> | Ghent University Hospital, Belgium                                | 6  | 0.6 |
| <b>35</b> | Kochi Medical School Hospital, Kochi University, Japan            | 4  | 0.4 |
| <b>36</b> | Mater Dei Hospital, Malta                                         | 4  | 0.4 |
| <b>37</b> | Odense University Hospital, Odense, Denmark                       | 3  | 0.3 |
| <b>38</b> | Evelina Children's Hospital, London, UK                           | 3  | 0.3 |
| <b>39</b> | Freeman Hospital, Newcastle, UK                                   | 2  | 0.2 |

eTable 2. Summary of Candidate Predictors Following Systematic Review of Literature[1]

| <b>Candidate predictor</b>                | <b>Total number of studies using univariable/multivariable survival analysis with cardiac death as an end-point</b> | <b>Total number of studies using univariable/multivariable survival analysis with SCD as an end-point</b> | <b>Number of studies showing significant independent association with cardiac death univariable survival analysis</b> | <b>Number of studies showing significant independent association with SCD univariable survival analysis</b> | <b>Number of studies showing significant independent association with cardiac death in multivariable survival analysis</b> | <b>Number of studies showing significant independent association with SCD in multivariable survival analysis</b> |
|-------------------------------------------|---------------------------------------------------------------------------------------------------------------------|-----------------------------------------------------------------------------------------------------------|-----------------------------------------------------------------------------------------------------------------------|-------------------------------------------------------------------------------------------------------------|----------------------------------------------------------------------------------------------------------------------------|------------------------------------------------------------------------------------------------------------------|
| <b>Age</b>                                | 11[2-12]                                                                                                            | 6 [6, 8, 9, 11-13]1                                                                                       | 3[5-7]                                                                                                                | 1 [6]                                                                                                       | 0                                                                                                                          | 0                                                                                                                |
| <b>Gender</b>                             | 5 [3-5, 12, 14]                                                                                                     | 2 [12, 14] 0                                                                                              | 1[3]                                                                                                                  | 0                                                                                                           | 1[3]                                                                                                                       | 0                                                                                                                |
| <b>NYHA/Ross</b>                          | 4[2, 3, 8, 9, 15]                                                                                                   | 2 [5, 9] 1                                                                                                | 2 [9, 15]                                                                                                             | 1 [9]                                                                                                       | 1 [3]                                                                                                                      | 0                                                                                                                |
| <b>Unexplained syncope</b>                | 7 [7, 9, 11, 14-17]                                                                                                 | 6 [7, 9, 11, 14-16] 2                                                                                     | 3 [7, 15, 16]                                                                                                         | 3 [7, 15, 16]                                                                                               | 1 [15]                                                                                                                     | 1 [15]                                                                                                           |
| <b>Family history of SCD</b>              | 7 [3, 4, 7, 9, 11, 14, 17] 1                                                                                        | 4 [7, 9, 11, 14] 1                                                                                        | 0                                                                                                                     | 0                                                                                                           | 1[14]                                                                                                                      | 1[14]                                                                                                            |
| <b>Non-sustained VT on ambulatory ECG</b> | 6 [4, 7, 9, 11, 17, 18]                                                                                             | 4 [7, 9, 11, 18] 2                                                                                        | 2 [11, 18]                                                                                                            | 2 [11, 18]                                                                                                  | 0                                                                                                                          | 0                                                                                                                |
| <b>Left ventricular hypertrophy+</b>      | 13 [2-5, 7-9, 11, 12, 14, 17-19]                                                                                    | 9 [5, 7-9, 11, 12, 14, 18, 19] 3                                                                          | 9 [2-5, 7, 12, 17-19]                                                                                                 | 6 [5, 7, 9, 12, 18, 19]                                                                                     | 2 [4, 5]                                                                                                                   | 1 [5]                                                                                                            |
| <b>Left atrial diameter</b>               | 3 [8, 9, 19]                                                                                                        | 3 [8, 9, 19] 0                                                                                            | 1 [9]                                                                                                                 | 1 [9]                                                                                                       | 1[8]                                                                                                                       | 1[8]                                                                                                             |

|                                                     |                         |                |        |       |   |   |
|-----------------------------------------------------|-------------------------|----------------|--------|-------|---|---|
| <b>Left ventricular outflow tract obstruction*</b>  | 6 [2, 4, 9, 11, 17, 20] | 2 [9, 11] 0    | 1 [4]  | 1 (9) | 0 | 0 |
| <b>Abnormal blood pressure response to exercise</b> | 4 [7, 9, 14, 17]        | 3 [7, 9, 14] 1 | 1 [17] | 0     | 0 | 0 |

The following search strategy was used to identify studies:

MEDLINE search: MeSH terms “((hypertrophic cardiomyopathy) AND (death OR sudden death OR cardiac death OR outcome OR prognosis OR risk factors) AND (children OR childhood OR young OR paediatric)). Search was limited to: original articles written in English; patients aged < 18 years; published 1963 to December 2015. Initial search strategy was supplemented with manual searches

Risk factors examined in more than 2 survival studies using SCD as an end-point were considered as candidate predictors.

+ Measure of left ventricular hypertrophy varied between studies: extreme left ventricular hypertrophy (maximal wall thickness >30mm/Z score >6)[4, 9, 14, 17-19]; interventricular septal wall thickness (IVST) [3-5, 7-9, 11, 12, 19]; left ventricular posterior wall thickness (LVPWT) [2-4, 12, 19]; LVPWT:LV cavity [5, 9]

\*Measure of LVOTO varied between studies: LVOT gradient, mmHg (9, 20), peak LVOTO gradient >20mmHg (11), peak LVOTO gradient >16mmHg (2, 4, 17)



eTable 3. Baseline Clinical Characteristics by Era

|                                                | <b>Whole cohort</b> | <b>Pre-1990 (n=29)</b> | <b>1990-1999 (n=129)</b> | <b>2000-2009 (n=416)</b> | <b>2010 onwards (n=450)</b> |
|------------------------------------------------|---------------------|------------------------|--------------------------|--------------------------|-----------------------------|
| <b>Male gender</b>                             | 699 (68.3%)         | 18 (62.1%)             | 79 (61.2%)               | 289 (69.5%)              | 313 (69.6%)                 |
| <b>Age (median, IGQ)</b>                       | 11 (7,14)           | 8 (5,13)               | 11 (5,13)                | 11 (7,14)                | 11 (7,14)                   |
| <b>Family history of HCM (n=1006)</b>          | 534 (53.1%)         | 11 (38%)               | 70 (54.7%)               | 220 (53.5%)              | 233 (53.2%)                 |
| <b>Family history SCD (n=1020)</b>             | 130 (12.8%)         | 4 (13.8%)              | 23 (18%)                 | 54 (13%)                 | 49 (11%)                    |
| <b>Unexplained syncope (n=1023)</b>            | 102 (9.9%)          | 5 (17.2%)              | 18 (14%)                 | 44 (10.6%)               | 35 (7.8%)                   |
| <b>NYHA/Ross &gt;1 (n=1006)</b>                | 223 (22.2%)         | 11 (40.3%)             | 36 (28.4%)               | 95 (23.6%)               | 81 (18.1%)                  |
| <b>NSVT (n=856)</b>                            | 55 (6.4%)           | 11 (40.7%)             | 6 (5.3%)                 | 28 (7.9%)                | 10 (2.8%)                   |
| <b>MWT (mm) [mean, +/- SD] (n=997)</b>         | 17.1 (7.4)          | 22 (+/-8.9)            | 19.4 (+/- 8.1)           | 17.4 (+/- 7.5)           | 16 (+/-6.7)                 |
| <b>MWT z-score [mean, +/- SD] (n=906)</b>      | 11.1 (7.1)          | 16.2 (+/- 8.5)         | 14.3 (+/- 8.0)           | 11.4 (+/- 7.3)           | 9.8 (+/- 6.4)               |
| <b>LA diameter (mm) [mean, +/- SD] (n=712)</b> | 33.4 (8.5)          | 33.6 (+/- 6.1)         | 34.1 (+/- 8.2)           | 35.8 (+/- 8.8)           | 31.3 (+/- 7.8)              |
| <b>LA z-score [mean, +/- SD] (n=675)</b>       | 1.9 (2.3)           | 2.8 (+/-2.5)           | 2.4 (+/-2.1)             | 2.6 (+/-2.6)             | 1.3 (+/- 1.9)               |
| <b>LVOTg max [median, IQR] (n=871)</b>         | 9 (6, 22)           | 10 (5,10)              | 12 (6, 46)               | 10 (6, 23)               | 8 (5, 16)                   |

n=1024 unless otherwise indicated. NYHA = New York Heart Association, SCD = sudden

cardiac death, MWT=maximal wall thickness, LA = left atrium, LVOTg max = Maximal left

ventricular outflow tract gradient. NSVT = non-sustained ventricular tachycardia

eTable 4: Summary of Missing Data

|                                           |           | N (%)       |
|-------------------------------------------|-----------|-------------|
| <b>Age (mean, 95% CI)</b>                 |           | NA          |
| <b>Male gender</b>                        |           | NA          |
| <b>Family history HCM</b>                 |           | 18 (1.7%)   |
| <b>Family history SCD</b>                 |           | 4 (0.4%)    |
| <b>Unexplained Syncope</b>                |           | 1 (0.1%)    |
| <b>NYHA/Ross (n=1006)</b>                 | <b>1</b>  | 18 (1.7%)   |
|                                           | <b>2+</b> |             |
| <b>NSVT on ambulatory ECG</b>             |           | 168 (16.4%) |
| <b>MWT (mm) [mean, +/- SD]</b>            |           | 27 (2.6%)   |
| <b>Z score MWT [mean, +/- SD]</b>         |           | 118 (11.5%) |
| <b>LA diameter (mm [mean, +/- SD]</b>     |           | 312 (30.4%) |
| <b>Z score LA diameter [mean, +/- SD]</b> |           | 349 (34.1%) |
| <b>LVOTg max [median, IQR]</b>            |           | 153 (14.9%) |
| <b>Number of predictors missing</b>       |           |             |
|                                           | <b>0</b>  | 527 (51.5%) |
|                                           | <b>1</b>  | 252 (24.6%) |
|                                           | <b>2</b>  | 176 (17.2%) |
|                                           | <b>3</b>  | 69 (6.7%)   |

eTable 5. Sensitivity Analysis: Model Including Age and Family History of SCD

| SCD risk prediction model + age + FH |                       |         |
|--------------------------------------|-----------------------|---------|
|                                      | Hazard ratio (95% CI) | P-value |
| Age                                  | 1.04 (0.99-1.09)      | 0.169   |
| Unexplained syncope                  | 1.48 (0.76-2.90)      | 0.251   |
| NSVT                                 | 1.23 (0.56-2.72)      | 0.607   |
| zscoreLA                             | 1.14 (1.03-1.27)      | 0.010   |
| zscoreMWT                            | 1.23 (1.05-1.44)      | 0.009   |
| zscoreMWT <sup>2</sup>               | 0.995 (0.991-1.000)   | 0.058   |
| LVOT                                 | 0.994 (0.986-1.002)   | 0.114   |
| Family history of SCD                | 0.85 (0.51-1.43)      | 0.547   |
| <b>Uno's C statistic</b>             | 0.69 (0.66, 0.72)     |         |
| <b>Calibration slope</b>             | 0.92 (0.53, 1.32)     |         |

## eAppendix. HCM Risk-Kids Calculator

### HCM Risk-Kids calculator for the primary prevention of SCD

|                                          | Enter patient characteristics * | Coefficients | Coefficients |
|------------------------------------------|---------------------------------|--------------|--------------|
| Sex (M=1, F=0)                           | 0                               |              |              |
| Weight (Kg)                              | 10                              |              |              |
| BSA                                      | 0.489638584                     |              |              |
| MWT (mm)                                 | 7                               |              |              |
| MWT z score                              | 3.904719745                     | 0.2171364    | 0.0047562    |
| LA diameter (mm)                         | 23                              |              |              |
| LA z score                               | 1.737194333                     | 0.130365     |              |
| LVOT gradient (mmHg)                     | 20                              | 0.0065555    |              |
| NSVT (yes=1, no=0)                       | 1                               | 0.1861694    |              |
| Unexplained syncope (yes=1, no=0)        | 0                               | 0.429624     |              |
| Prognostic index                         | -0.630415507                    |              |              |
| Survival from SCD at 5 years             | 0.972755824                     |              |              |
| <b>Estimated SCD risk at 5 years (%)</b> | <b>2.72441755</b>               |              |              |

\* calculated values

## Definitions

*MWT, Maximal LV wall thickness on TTE measurement -at time of evaluation (mm)*

*MWT z score, Left atrial diameter determined by M-Mode or 2D echocardiography in the parasternal long axis plane at time of evaluation (mm)*

*LA z score, The maximum LV outflow gradient determined at rest and with Valsalva provocation (irrespective of concurrent medical treatment) using pulsed and continuous wave Doppler from the apical three and five chamber views. Peak outflow tract gradients were determined using the modified Bernouilli equation:*

*LVOT gradient, Gradient=  $4V^2$ , where V is the peak aortic outflow velocity*

*NSVT,  $\geq 3$  consecutive ventricular beats at a rate of  $\geq 120$  beats per minute and  $< 30$ s in duration on Holter monitoring (minimum duration 24 hours) at or prior to evaluation*

*Unexplained syncope, History of unexplained syncope at or prior to evaluation*

## eReferences.

1. Norrish, G., et al., *Risk factors for sudden cardiac death in childhood hypertrophic cardiomyopathy: A systematic review and meta-analysis.* Eur J Prev Cardiol, 2017: p. 2047487317702519.
2. Nugent, A.W., et al., *Clinical features and outcomes of childhood hypertrophic cardiomyopathy: results from a national population-based study.* Circulation, 2005. **112**(9): p. 1332-8.
3. Lipshultz, S.E., et al., *Risk stratification at diagnosis for children with hypertrophic cardiomyopathy: an analysis of data from the Pediatric Cardiomyopathy Registry.* Lancet, 2013. **382**(9908): p. 1889-97.
4. El-Saiedi, S.A., Z.S. Seliem, and R.I. Esmail, *Hypertrophic cardiomyopathy: prognostic factors and survival analysis in 128 Egyptian patients.* Cardiol Young, 2014. **24**(4): p. 702-8.
5. Ostman-Smith, I., et al., *Echocardiographic and electrocardiographic identification of those children with hypertrophic cardiomyopathy who should be considered at high-risk of dying suddenly.* Cardiol Young, 2005. **15**(6): p. 632-42.
6. Ostman-Smith, I., et al., *Age- and gender-specific mortality rates in childhood hypertrophic cardiomyopathy.* Eur Heart J, 2008. **29**(9): p. 1160-7.
7. Moak, J.P., et al., *Long-term follow-up of children and adolescents diagnosed with hypertrophic cardiomyopathy: risk factors for adverse arrhythmic events.* Pediatr Cardiol, 2011. **32**(8): p. 1096-105.
8. Maskatia, S.A., et al., *Restrictive physiology is associated with poor outcomes in children with hypertrophic cardiomyopathy.* Pediatr Cardiol, 2012. **33**(1): p. 141-9.
9. Ziolkowska, L., et al., *Predictors of Long-Term Outcome in Children with Hypertrophic Cardiomyopathy.* Pediatr Cardiol, 2016. **37**(3): p. 448-58.
10. Colan, S.D., et al., *Epidemiology and cause-specific outcome of hypertrophic cardiomyopathy in children: findings from the Pediatric Cardiomyopathy Registry.* Circulation, 2007. **115**(6): p. 773-81.
11. Yetman, A.T., et al., *Long-term outcome and prognostic determinants in children with hypertrophic cardiomyopathy.* J Am Coll Cardiol, 1998. **32**(7): p. 1943-50.
12. Bharucha, T., et al., *Sudden death in childhood cardiomyopathy: results from a long-term national population-based study.* J Am Coll Cardiol, 2015. **65**(21): p. 2302-10.
13. Moak, J.P. and J.P. Kaski, *Hypertrophic cardiomyopathy in children.* Heart, 2012. **98**(14): p. 1044-54.
14. Kamp, A.N., et al., *Implanted defibrillators in young hypertrophic cardiomyopathy patients: a multicenter study.* Pediatr Cardiol, 2013. **34**(7): p. 1620-7.
15. Romeo, F., et al., *Long-term prognosis in children with hypertrophic cardiomyopathy: an analysis of 37 patients aged less than or equal to 14 years at diagnosis.* Clin Cardiol, 1990. **13**(2): p. 101-7.
16. McKenna, W.J. and J.E. Deanfield, *Hypertrophic cardiomyopathy: an important cause of sudden death.* Arch Dis Child, 1984. **59**(10): p. 971-5.
17. Decker, J.A., et al., *Risk factors and mode of death in isolated hypertrophic cardiomyopathy in children.* J Am Coll Cardiol, 2009. **54**(3): p. 250-4.

18. Maron, B.J., et al., *Prevention of sudden cardiac death with implantable cardioverter-defibrillators in children and adolescents with hypertrophic cardiomyopathy*. J Am Coll Cardiol, 2013. **61**(14): p. 1527-35.
19. McMahon, C.J., et al., *Characterization of left ventricular diastolic function by tissue Doppler imaging and clinical status in children with hypertrophic cardiomyopathy*. Circulation, 2004. **109**(14): p. 1756-62.
20. Hickey, E.J., et al., *Hypertrophic cardiomyopathy in childhood: disease natural history, impact of obstruction, and its influence on survival*. Ann Thorac Surg, 2012. **93**(3): p. 840-8.
